# Supplementary material for: Microscopy deep learning predicts virus infections and reveals mechanics of lytic-infected cells
Source: PubMed Central journal article supplement — iScience. 2021 May 15;24(6):102543. doi: 10.1016/j.isci.2021.102543 (PMC8192562; doi:10.1016/j.isci.2021.102543), 2021-05-15

**iScience, Volume 24**

**Supplemental information**

**Microscopy deep learning predicts  
virus infections and reveals mechanics  
of lytic-infected cells**

**Vardan Andriasyan, Artur Yakimovich, Anthony Petkidis, Fanny Georgi, Robert Witte, Daniel Puntener, and Urs F. Greber**

## Supplemental Data

**Suppl. Fig. S1: CNN architecture, dataset generation pipelines and training quality of ViResNet for infection classification** (related to Fig. 1).

A) Effect of Hoechst on AdV plaque formation.

B) Training dataset generation pipeline for infection classification.

C) ViResNet architecture schematic.

D) ROC curves for infection prediction (AdV, HSV-1) of trained ViResNet, Decision tree, SVM and k-NN classifiers.

E) ViResNet infection prediction for AdV-C5-IX-FS2A-GFP. Note that AdV-C5 is a distinct serotype from AdV-C2, which was used for network training. The infection prediction for AdV-C5 yielded 93% accuracy.

# A No significant effect of Hoechst on AdV plaque formation

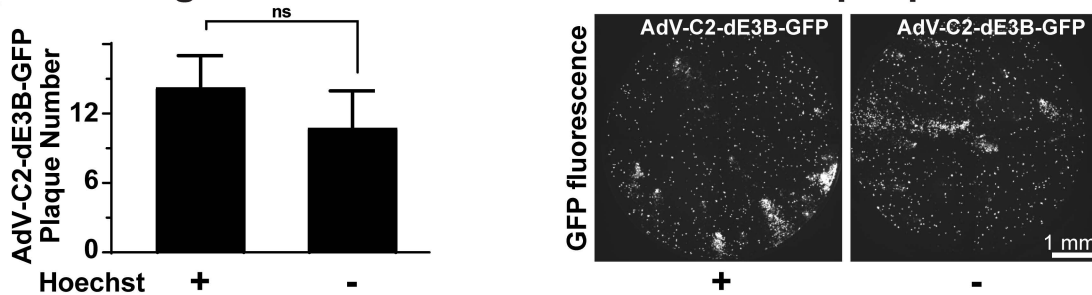

# B Training dataset generation for infection classification

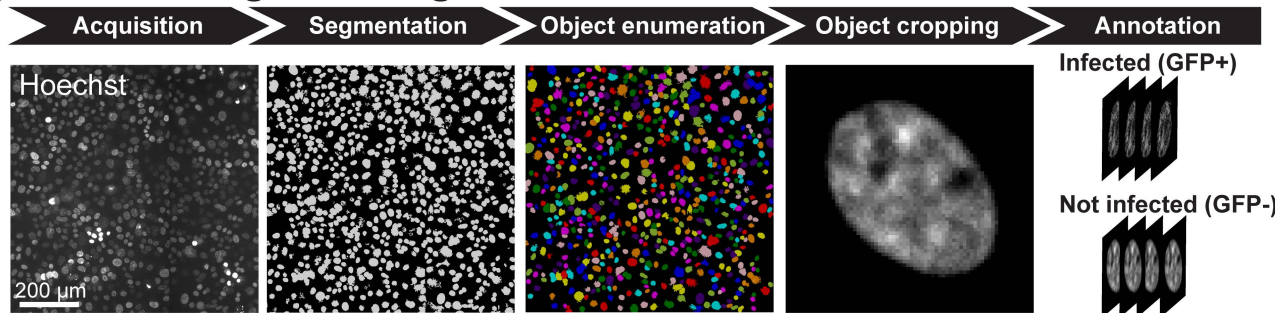

# C ViResNet architecture

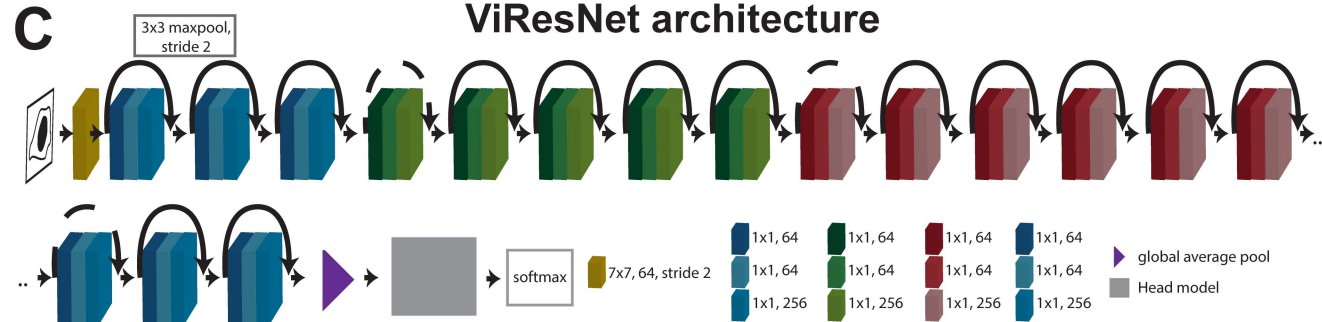

# D Training quality: Operating characteristics

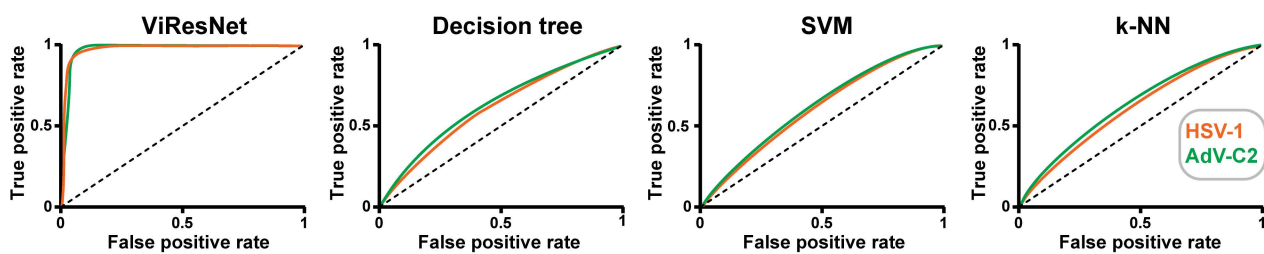

# E Predicting infection for virus not included in the training set

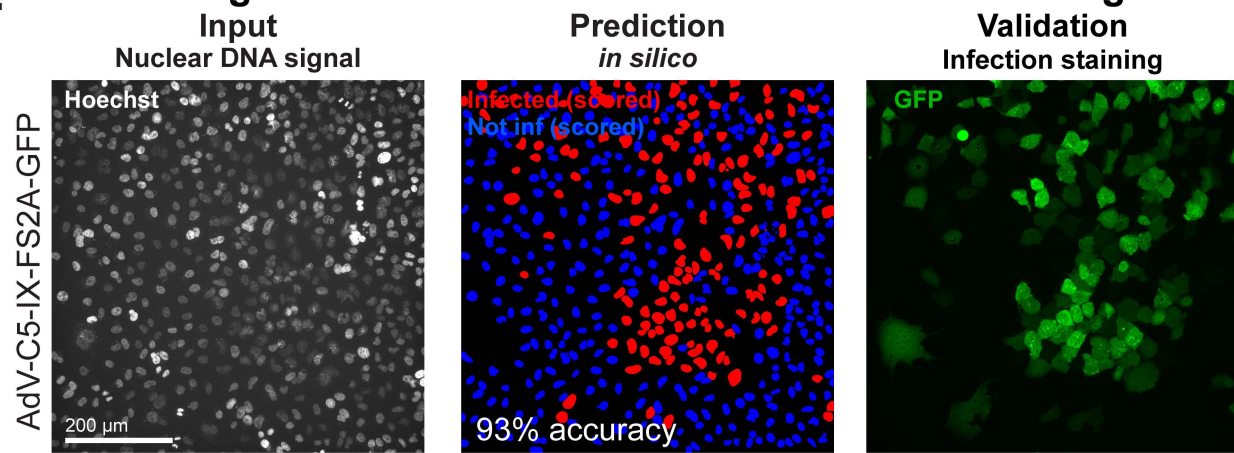

**Suppl. Fig. S2: Dataset generation pipelines and training quality of ViResNet for infection prediction** (related to Fig. 3).

A) Training dataset generation pipeline for prediction of spreading and nonspreading infected nuclei, respectively.

B) Receiver operating characteristic (ROC) curves for infection prediction of trained ViResNet and multilayer perceptron. S, NS and NI denote spreader, nonspreader and not infected nuclei accordingly.

C) Average ViResNet accuracy for randomly sampled test images from different timepoints. Each datapoint is the average accuracy of test images, previously not seen by the network. Suppl. Fig. S3: Samples of prospective spreader, nonspreader and not infected nuclei at pre- and post-ablation stages (related to Fig. 5). All images are represented as Z-stacks with Nyquist sampling.

# A Training procedure to distinguish spreader & nonspreader nuclei

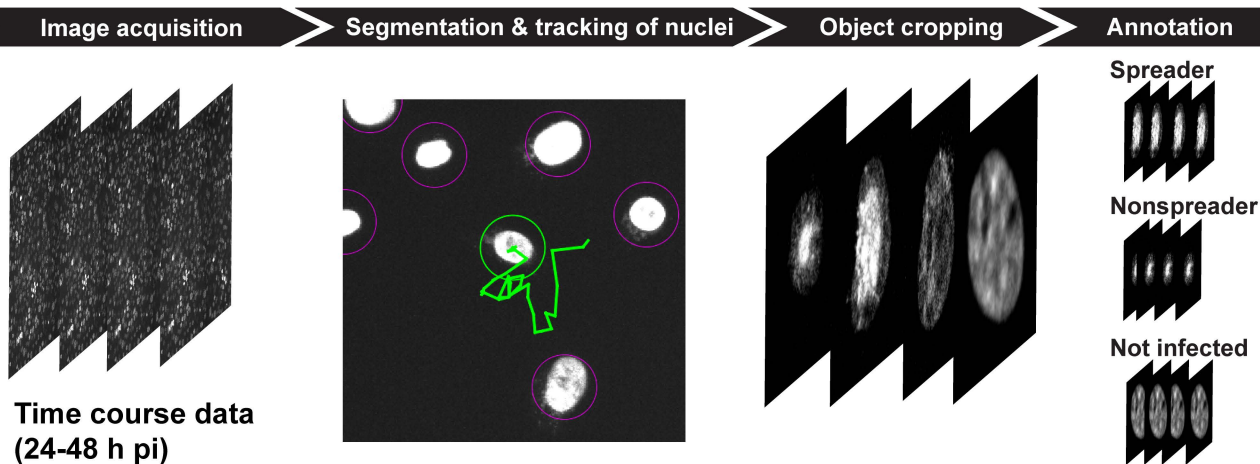

# B Training quality: Operating characteristics

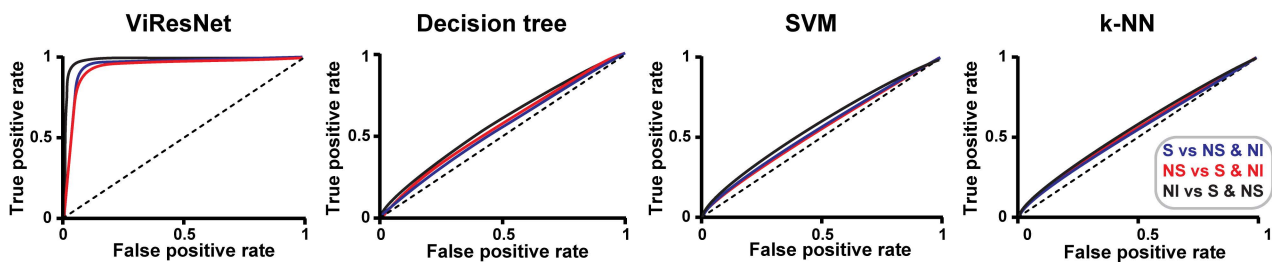

# C Timepoint sensitivity of ViResNet

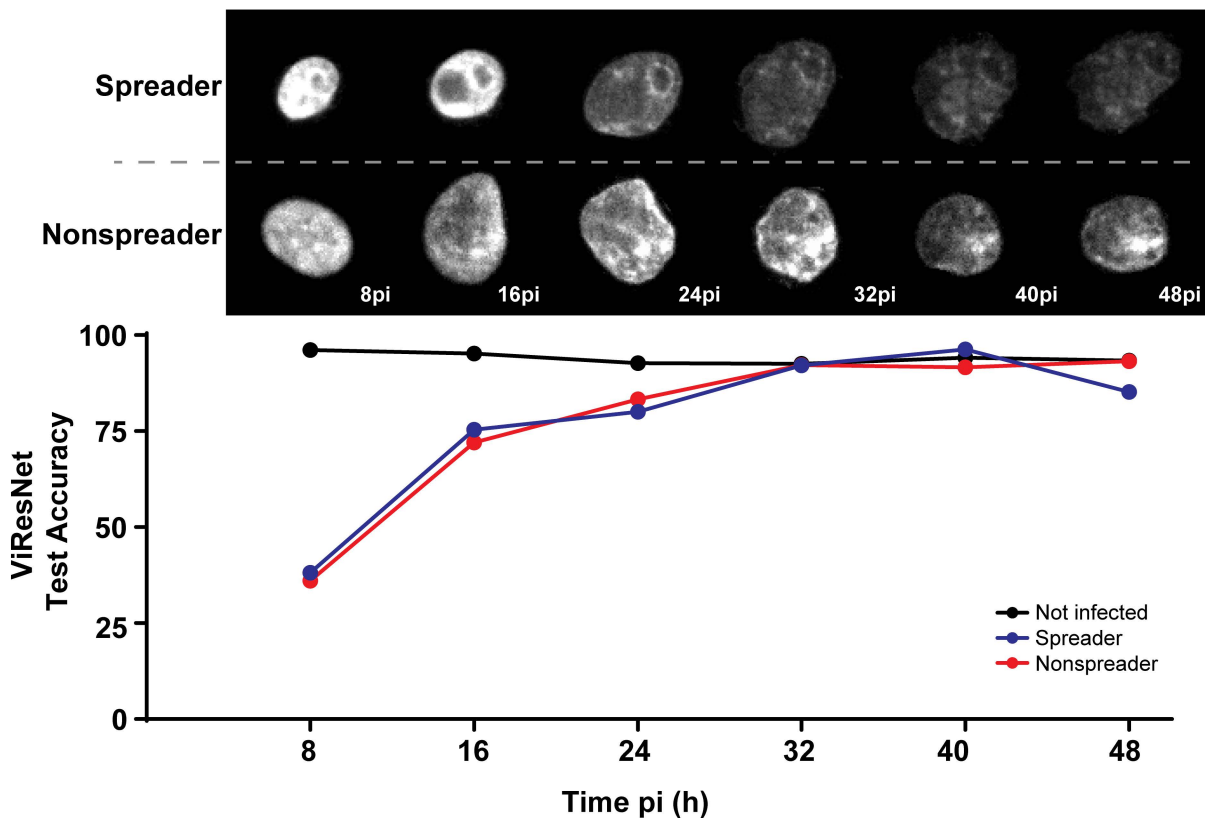

**Suppl. Fig. S3: Samples of prospective spreader, nonspreader and not infected nuclei at pre- and post-ablation stages (related to Fig. 5). All images are represented as Z-stacks with Nyquist sampling.**

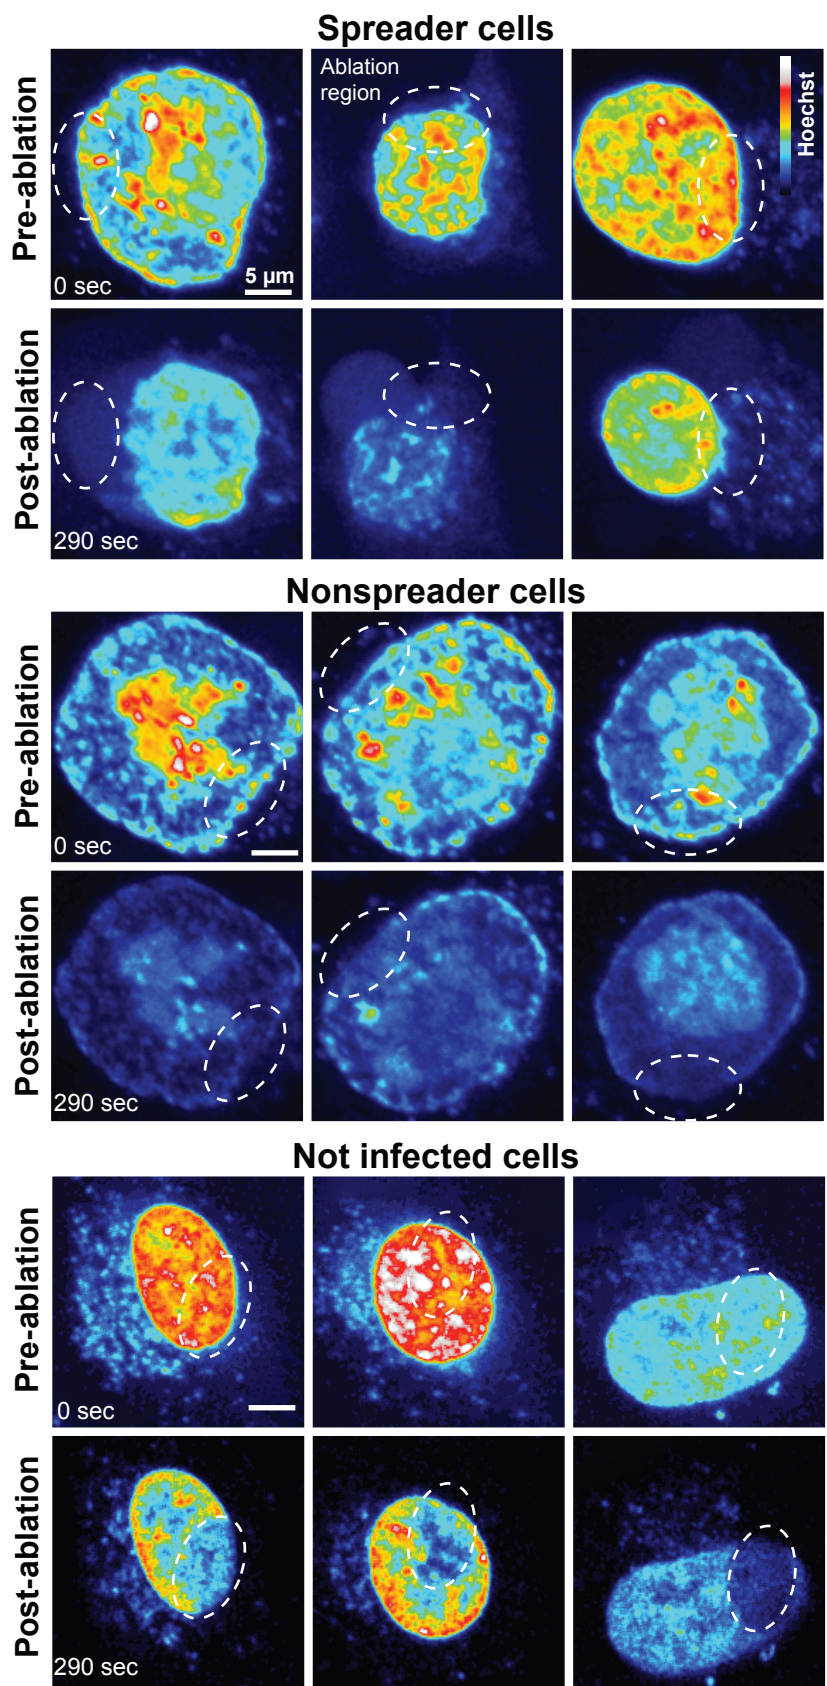

Supplement: mmc1.pdf [file mmc1.pdf]
